# Supplementary material for: The Aspergillus flavus Homeobox Gene, hbx1, Is Required for Development and Aflatoxin Production
Source: PubMed Central journal article supplement (PMC5666362; doi:10.3390/toxins9100315), 2017-10-12
Supplement: toxins-09-00315-s001.pdf [file toxins-09-00315-s001.pdf]

## Supplementary Materials: The *Aspergillus flavus* homeobox gene, *hbx1*, is required for development and aflatoxin production

Jeffrey W. Cary, Pamela Harris-Coward, Leslie Scharfenstein, Brian M. Mack, Perng-Kuang Chang, Qijian Wei, Matthew Lebar, Carol Carter-Wientjes, Rajtilak Majumdar, Chandrani Mitra, Sourav Banerjee and Anindya Chanda

Table S1. Strains and plasmids used in this study.

| Strains                          | Genotype                                                              | Reference                       |
|----------------------------------|-----------------------------------------------------------------------|---------------------------------|
| <u><i>Aspergillus flavus</i></u> |                                                                       |                                 |
| CA14 SRRC 1709                   | $\Delta ku70, \Delta niaD, \Delta pyrG, ptrA^S$                       | Chang et al., 2010              |
| CA14 pPTRI                       | $\Delta ku70, \Delta niaD, \Delta pyrG, ptrA^R$                       | Cary et al., 2015               |
| AF70 SRRC 1713                   | $\Delta ku70, \Delta niaD, \Delta pyrG, ptrA^S$                       | This study                      |
| AF70 pPTRI                       | $\Delta ku70, \Delta niaD, \Delta pyrG, ptrA^R$                       | This study                      |
| AF70 pyrG-1                      | $\Delta ku70, \Delta niaD, pyrG, ptrA^S$                              | This study                      |
| CA14 hbx mutants                 | $\Delta ku70, \Delta niaD, \Delta pyrG, \Delta hbx::ptrA$             | This study                      |
| AF70 $\Delta hbx1$ #4            | $\Delta ku70, \Delta niaD, \Delta pyrG, \Delta hbx1::ptrA$            | This study                      |
| AF70 $\Delta hbx1$ -com #8       | $\Delta ku70, \Delta niaD, \Delta hbx1::ptrA, hbx1::pyrG$             | This study                      |
| CA14 hbx1-GFP-nmt1-pyrG #18      | $\Delta ku70, \Delta niaD, gpdA(p)::hbx1::egfp::nmt1(t)::pyrG$        | This study                      |
| CA14 hbx1-GFP-H2A-mcherry        | $\Delta ku70, gpdA(p)::hbx1::egfp::nmt1(t)::pyrG, H2A::mcherry, niaD$ | This study                      |
| <u>Plasmids</u>                  |                                                                       |                                 |
| pPTRI                            | <i>Aspergillus oryzae ptrA</i>                                        | Cary et al., 2015               |
| pUC18-gpd-GFP-nmt1               | $gpd(p)::egfp::nmt1(t)$                                               | Rajasekaran et al., 2008        |
| pJES42.1                         | $gpdA(p)::H2A::mcherry$                                               | Spraker and Keller <sup>a</sup> |
| pSL82                            | <i>Aspergillus parasiticus niaD</i>                                   | Horng et al., 1990              |

<sup>a</sup> unpublished data

Table S2. Oligonucleotide primers used for construction of *hbx* gene knockout PCR products

| Primer designation         | Oligonucleotide sequence (5'-3')           |
|----------------------------|--------------------------------------------|
| <u>Fusion PCR knockout</u> |                                            |
| ptrA-F                     | GGGCAATTGATTACGGG                          |
| ptrA-R                     | TGACGATGAGCCGCTCTTGC                       |
| <i>hbx1</i> F1-F           | CCAATCTCTCCATCCGCTTGT                      |
| <i>hbx1</i> F1-R           | gggatcccgtaatcaattgccTCCAGGGTCTCAACTTGT    |
| <i>hbx1</i> F3-F           | caagagcggctcatcgtcaccACACCTGCTTCTAACTCACGA |
| <i>hbx1</i> F3-R           | CAGACGCCGAAGAAACACAC                       |
| <i>hbx1</i> nest-F         | GGTGCAATCCTCGTCTGGAA                       |
| <i>hbx1</i> nest-R         | CGGCAAAGGAAGACAGTTC                        |
| <i>hbx2</i> F1-F           | TGTCTCCATCGTCATCGTGTG                      |
| <i>hbx2</i> F1-R           | gggatcccgtaatcaattgccTGTCTGCTCGGAATCGCTATG |
| <i>hbx2</i> F3-F           | caagagcggctcatcgtcaccTCCCAACGCCAATCTCCCTT  |
| <i>hbx2</i> F3-R           | GGTGTCTCTCCTCATCTGTCT                      |
| <i>hbx2</i> nest-F         | CATCCATCCTTCGTTCTGCTC                      |
| <i>hbx2</i> nest-R         | ACAAGCAAACCGTGGTAATGC                      |
| <i>hbx3</i> F1-F           | ATAACCGAGACCACCAAGCC                       |
| <i>hbx3</i> F1-R           | gggatcccgtaatcaattgccGGATTGTTTGATGGCGGGTT  |
| <i>hbx3</i> F3-F           | caagagcggctcatcgtcaccTGGTAAAGTTCGTCCCGCTC  |
| <i>hbx3</i> F3-R           | TGGCTGAAAGGATGACGACG                       |
| <i>hbx3</i> nest-F         | CCCAAGACCAAGGACAGTTAC                      |
| <i>hbx3</i> nest-R         | AAGGTGGTCTGTTGTCAGGATT                     |
| <i>hbx4</i> F1-F           | CCAGGATTACCACCAACGCA                       |
| <i>hbx4</i> F1-R           | gggatcccgtaatcaattgccATCGCAGCCCTCACCAGTTT  |
| <i>hbx4</i> F3-F           | caagagcggctcatcgtcaccTGGCATAACAACACTTCGCTG |
| <i>hbx4</i> F3-R           | CAACCCTAATCCCGCCAAC                        |
| <i>hbx4</i> nest-F         | TCCTCCACCCGTTTGTCTCT                       |
| <i>hbx4</i> nest-R         | CGGCATTGGAAAGAAGCGAAG                      |
| <i>hbx5</i> F1-F           | GATGCTGGTTGGTTCCTTCGT                      |
| <i>hbx5</i> F1-R           | gggatcccgtaatcaattgccAGAGTCGCCGTTGATAGGAAA |
| <i>hbx5</i> F3-F           | caagagcggctcatcgtcaccTCTGAAACCAACCATCTCCCA |
| <i>hbx5</i> F3-R           | CACAAACAAGGAAGAGCAGCA                      |
| <i>hbx5</i> nest-F         | GCACAGCAAAGAGGAATGGGTC                     |
| <i>hbx5</i> nest-R         | CACCGCATTCTCAAGACAC                        |
| <i>hbx6</i> F1-F           | GTTCCCTGGTGGAGAAGTCG                       |
| <i>hbx6</i> F1-R           | gggatcccgtaatcaattgccTCGTCAATTGAGGCATGGCT  |
| <i>hbx6</i> F3-F           | caagagcggctcatcgtcaccTGGAACAGTGGCGAGATTCC  |
| <i>hbx6</i> F3-R           | GGAGCTGGTCAAGGAGATCG                       |
| <i>hbx6</i> nest-F         | ATTGTCCTTGCTCGGGATCG                       |
| <i>hbx6</i> nest-R         | AAGGTGGGGAGTTCGTCAGT                       |
| <i>hbx7</i> F1-F           | CTTTCCCAAACCAGACGCAC                       |
| <i>hbx7</i> F1-R           | gggatcccgtaatcaattgccTCTGCCGTGCGAGTAACTT   |
| <i>hbx7</i> F3-F           | caagagcggctcatcgtcaccGTAGCAACATCAGAAGCACCA |
| <i>hbx7</i> F3-R           | GCTCGCAACTTGGACATAACT                      |
| <i>hbx7</i> nest-F         | CCGTTGGTATGGGTGTAGTTG                      |
| <i>hbx7</i> nest-R         | CGTTTGCTTTACGCTGCGAC                       |
| <i>hbx8</i> F1-F           | GTGCCCGTTGTTGCATTCTT                       |
| <i>hbx8</i> F1-R           | gggatcccgtaatcaattgccAACTCTCTTGGGGCTTGGGG  |
| <i>hbx8</i> F3-F           | caagagcggctcatcgtcaccGGTATTCTCGACCAGGCGAG  |
| <i>hbx8</i> F3-R           | GCGCAGAGGTGAAAAGCAAA                       |
| <i>hbx8</i> nest-F         | GCCGTCGTTCAGGACTTCTT                       |
| <i>hbx8</i> nest-R         | CACAACGCTAGCGAGTCCT                        |

lower case indicates overlap with either the ptrA-F or ptrA-R selectable marker sequence

Table S3. Oligonucleotide primers used in construction of the *hbx1*-com-pyrG and *hbx1*-GFP-nmt1-pyrG PCR products.

| Primer designation                               | Oligonucleotide sequence (5'-3')            |
|--------------------------------------------------|---------------------------------------------|
| <u>Fusion <math>\Delta</math><i>hbx1</i>-com</u> |                                             |
| construct                                        | CGGCTAACCAGAGGGAATCC                        |
| <i>hbx1</i> prom-F                               |                                             |
| <i>hbx1</i> term-R                               | tatagaagcacttaccttcgcatTAATGAGTGGTGCAGCACGT |
| pyrG-F                                           | ATGCGAAGGTAAGTGCTTCT                        |
| pyrG-R                                           | TGAAACATGACCCTTGACTCTGA                     |
| <i>hbx1</i> nest-F                               | TGGGCAGGTTTCACAGATGG                        |
| pyrG nest-R                                      | GTCCATATCTCGAGGCAGGC                        |
| <u>Fusion <i>hbx1</i>-GFP</u>                    |                                             |
| construct                                        | CGGCTAACCAGAGGGAATCC                        |
| <i>hbx1</i> prom-F                               | acagctcctcgcccttgctcacATTTCTCTCCAATCGCTCGG  |
| <i>hbx1</i> GFP-R                                | GTGAGCAAGGGCGAGGAG                          |
| GFP-F                                            | GGATGATGTTGAGTTCGCGC                        |
| nmt1-R                                           | cagcgcgaactcaacatcatccATGCGAAGGTAAGTGCTTCT  |
| nmt1 pyrG-F                                      | TGAAACATGACCCTTGACTCTGA                     |
| pyrG-R                                           | TGGGCAGGTTTCACAGATGG                        |
| <i>hbx1</i> nest-F                               | GTCCATATCTCGAGGCAGGC                        |
| pyrG nest-R                                      |                                             |

<sup>a</sup> lower case sequence overlaps with pyrG-F selectable marker sequence

<sup>b</sup> lower case sequence overlaps with GFP-F reporter gene sequence

<sup>c</sup> lower case sequence overlaps with nmt1-R terminator sequence

Table S4. Oligonucleotide primers used for qRT-PCR

| Primer designation | Oligonucleotide sequence (5'-3') |
|--------------------|----------------------------------|
| <i>hbx1</i> -F     | TCGGGTTGCTAACTGGTTCCA            |
| <i>hbx1</i> -R     | CTCTTCTTTGACGCTGCGGTT            |
| <i>hbx2</i> -F     | CCGATCGACTCCAAGAACAAA            |
| <i>hbx2</i> -R     | CTAGGATAAGGGTGGTCCAGAT           |
| <i>hbx3</i> -F     | GCCGTGGATAATGGTGTCTAT            |
| <i>hbx3</i> -R     | CGGTTGGGATGTAGGTATTCTC           |
| <i>hbx4</i> -F     | CGTTGGAGTCGTTCCAGAAT             |
| <i>hbx4</i> -R     | AAGCAGGGCGTTGGATAAA              |
| <i>hbx5</i> -F     | CGCCGGAAACCCAATTA AAC            |
| <i>hbx5</i> -R     | CAGGGATGTGGAGGACAATAAG           |
| <i>hbx6</i> -F     | GCACACCACGCCGATAATTC             |
| <i>hbx6</i> -R     | TTGCTCGACACAGCATTCT              |
| <i>hbx7</i> -F     | TGACTCTTTCACGTCGGATATG           |
| <i>hbx7</i> -R     | CTCTTGCGTCCCTTCCTTATT            |
| <i>hbx8</i> -F     | ACCGGTTCCGTTTCCCTTTT             |
| <i>hbx8</i> -R     | GTTGAAGTCCGTCGTCAGT              |
| <i>aflR</i> -F     | CTCAAGGTGCTGGCATGGTA             |
| <i>aflR</i> -R     | CAGCTGCCACTGTTGGTTTC             |
| <i>aflC</i> -F     | CGCCACCTATTTTGCCGATG             |
| <i>aflC</i> -R     | GTACTCAGACACAGACCGGC             |
| <i>aflD</i> -F     | CAGCACCATCACCAACATGC             |
| <i>aflD</i> -R     | CTGCACATGTCCTGGATCGA             |
| <i>aflM</i> -F     | CGCCACCTATTTTGCCGATG             |
| <i>aflM</i> -R     | GTACTCAGACACAGACCGGC             |
| <i>brlA</i> -F     | CGCTTATGATGACAACGTGGA            |
| <i>brlA</i> -R     | GAACCATAGGAGGGCATTG              |
| <i>abaA</i> -F     | GCTTTCAGCAAGAGCCCTTG             |
| <i>abaA</i> -R     | ACCTGCTTCTCGACCTCCTT             |
| <i>veA</i> -F      | TCATCGTAGTCGTAGTCATC             |
| <i>veA</i> -R      | GTTTCGTCTCGAGCGCCA               |
| <i>nsdC</i> -F     | ACAGCACGTCCCTTATGAATAC           |
| <i>nsdC</i> -R     | GCAAGTCCATTTTCATCCCTTG           |
| 18S-F              | TTCCTAGCGAGCCCAACCT              |
| 18S-R              | CCCGCCGAAGCAACTAAG               |

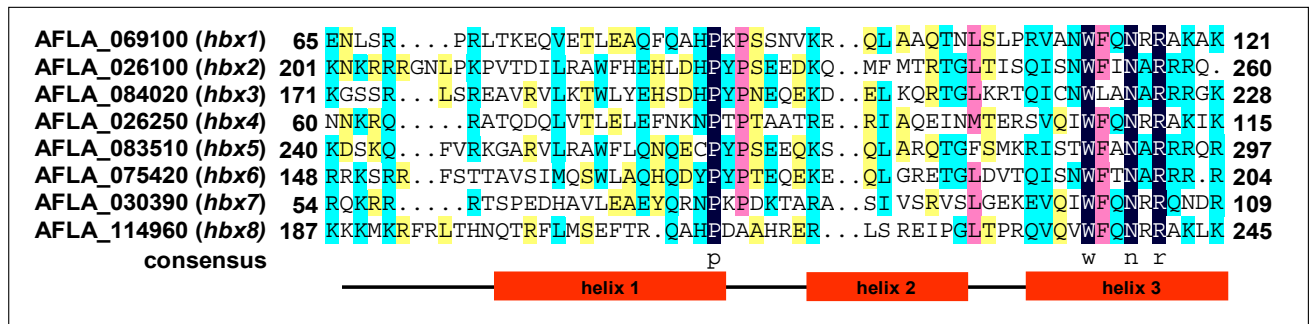

**Figure S1. Alignment of the eight *A. flavus* hbx gene homeodomains.** The alignment was obtained using ClustalW program of DNAMAN and colored according to the ClustalX color definitions. The three helical regions characteristic of the homoedomain were identified using the Chou-Fasman Secondary Structure Prediction Server (<http://www.biogem.org/tool/chou-fasman/>). Numbers flanking the amino acid sequences indicate the position of the first and last amino acids that comprise the deduced homeodomain.

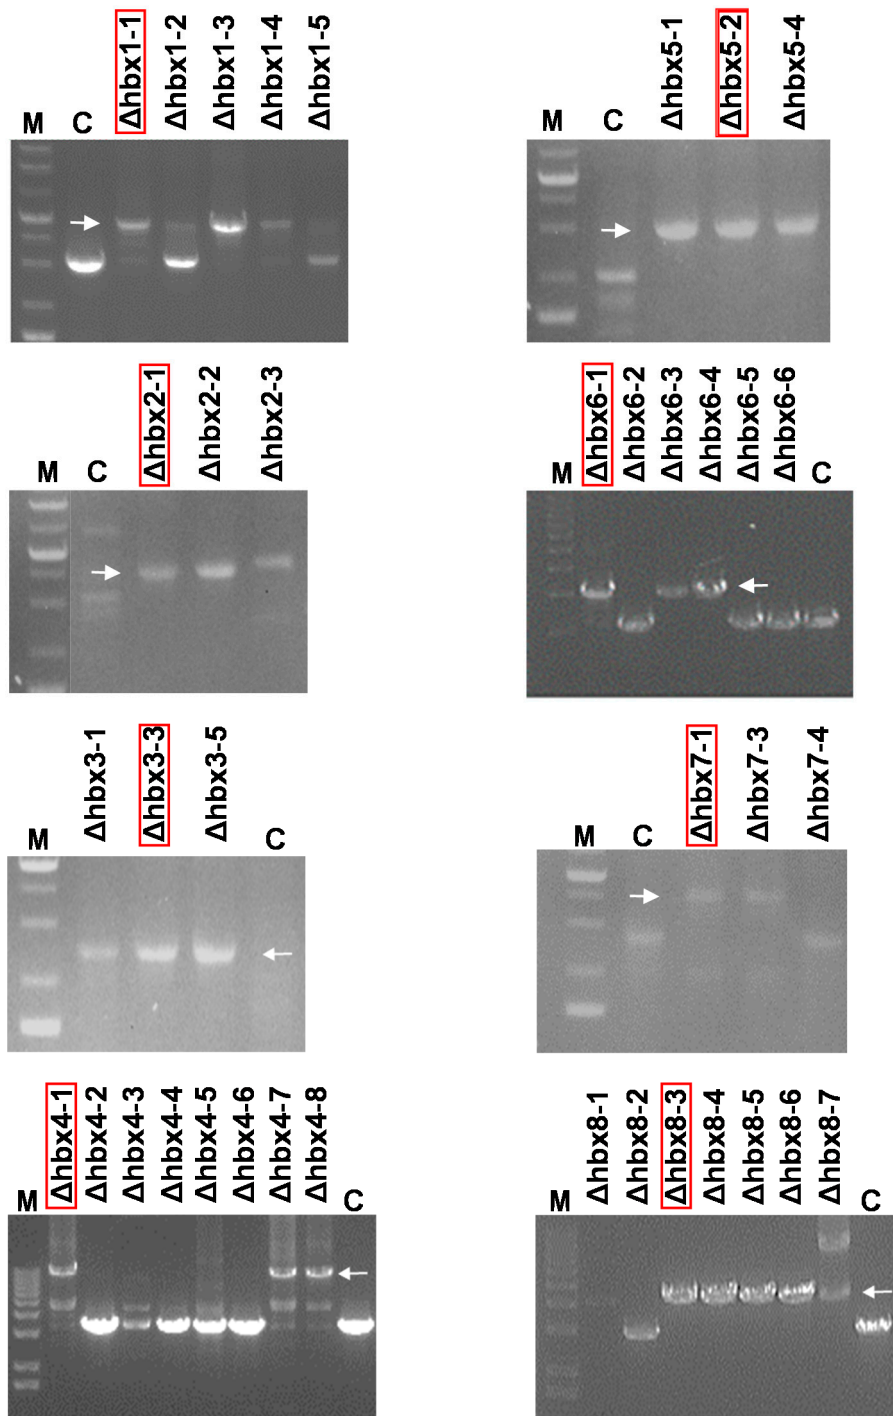

**Figure S2.** PCR confirmation of knockout of *A. flavus* CA14 *hbx* genes. DNA from putative *hbx* knockout transformants was amplified with primers *hbx* F1-F and *hbx* F3-R for the representative gene being analyzed. Genomic DNA was amplified with EmeraldAmp Max PCR Master Mix (Takara Bio). The PCR products were separated on a 1% agarose gel and observed following ethidium bromide staining. Gel images were captured on a Fujifilm LAS-3000 luminescent image analyzer. Arrows denote PCR product confirming successful replacement of the *hbx* gene region with the pyrithiamine (*ptrA*) selectable marker. Transformants used in subsequent experiments are boxed in red. Abbreviations: M, molecular size marker; C, CA14 control

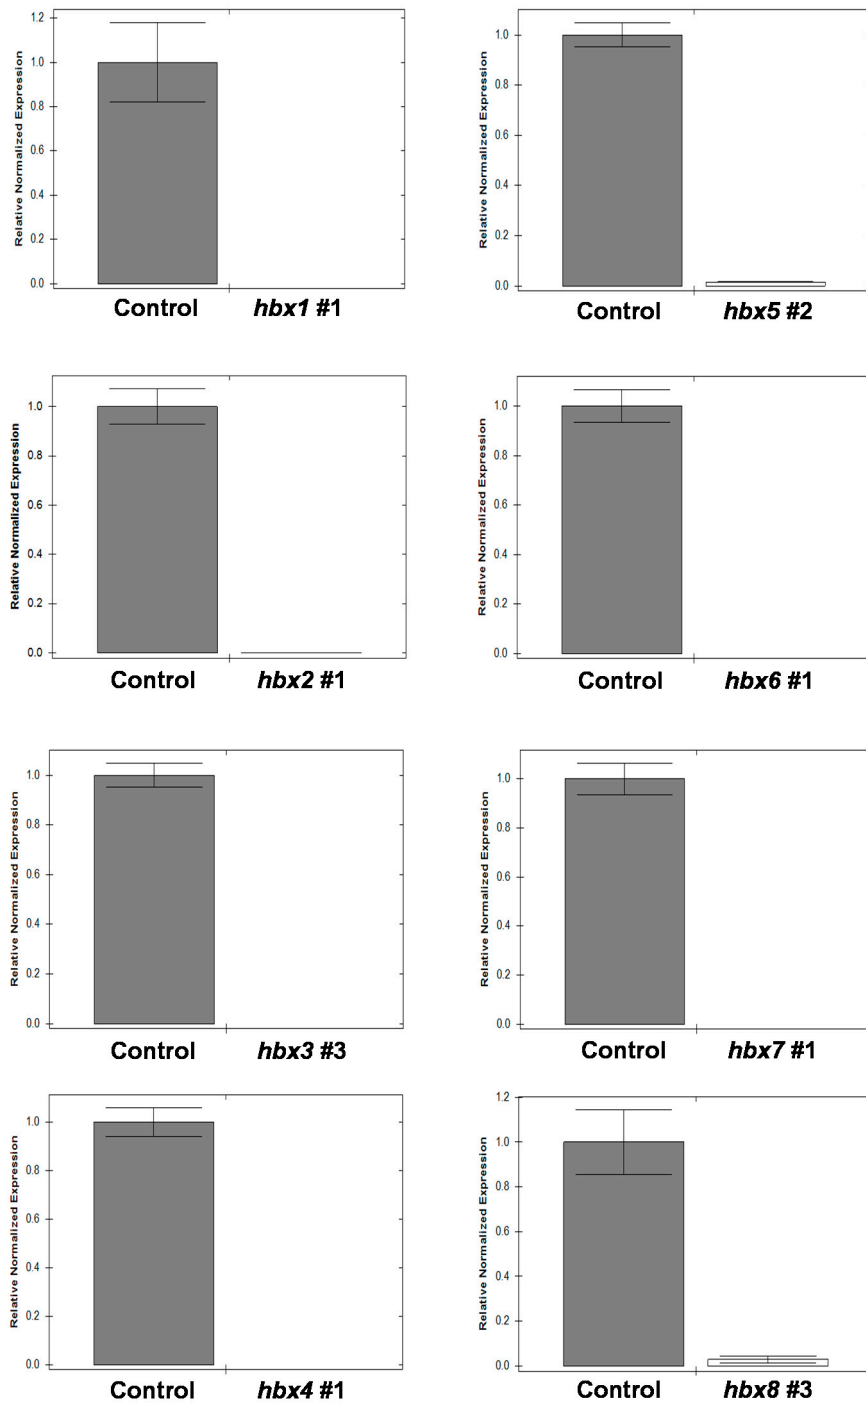

**Figure S3.** RT-qPCR analysis of *hbx* gene expression in control and knockout transformants. RNA was isolated from CA14 control and  $\Delta hbx$  mutants after 48 h growth on PDAU in the dark at 30 °C. Expression levels of *hbx* genes in the  $\Delta hbx$  mutants are relative to a level of 1 set for the corresponding control *hbx* gene. The relative gene expression levels for all time points were normalized to the *A. flavus* 18S rRNA Cq values.

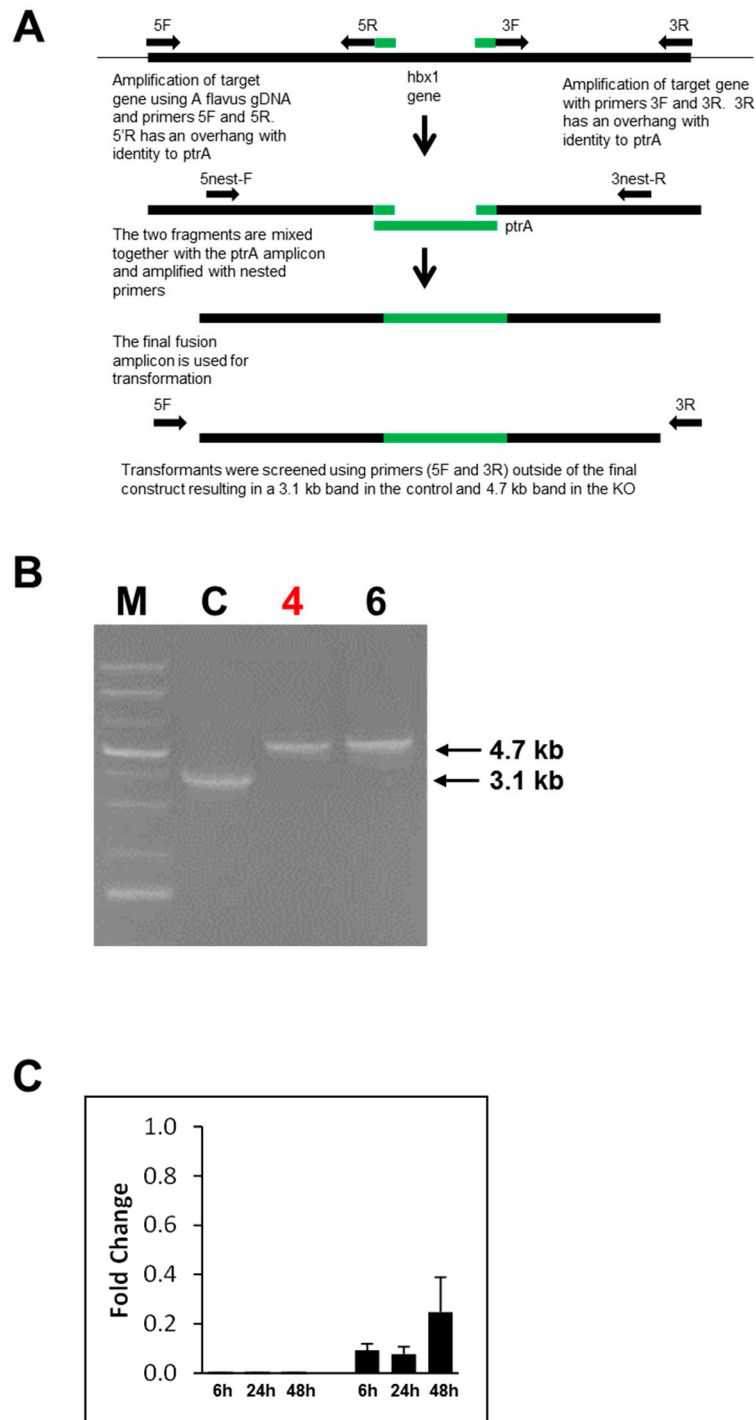

**Figure S4. PCR and RT-qPCR confirmation of knockout of *A. flavus* AF70 *hbx1* gene.** (A) Schematic of steps and primers used to confirm knock out the *hbx1* gene. (B) PCR confirmation of successful knockout of *hbx1* in AF70. DNA from putative *hbx1* knockout transformants was amplified with primers 5F and 3R. Genomic DNA was amplified with EmeraldAmp Max PCR Master Mix (Takara Bio). The PCR products were separated on a 1% agarose gel and observed following ethidium bromide staining. Arrows denote 4.7 kb PCR product confirming successful replacement of the *hbx1* gene region with the pyrithiamine (*ptrA*) selectable marker. Transformant used in subsequent experiments is denoted in red. Abbreviations: M, molecular size marker; C, AF70 control. (C) RT-qPCR analysis of *hbx1* expression in the  $\Delta hbx1$  #4 mutant (white bars) and genetically complemented  $\Delta hbx1$  #4 strain (black bars). Note total loss of *hbx1* expression in the mutant and restoration of expression in the genetically complemented  $\Delta hbx1$ -com #8 strain.



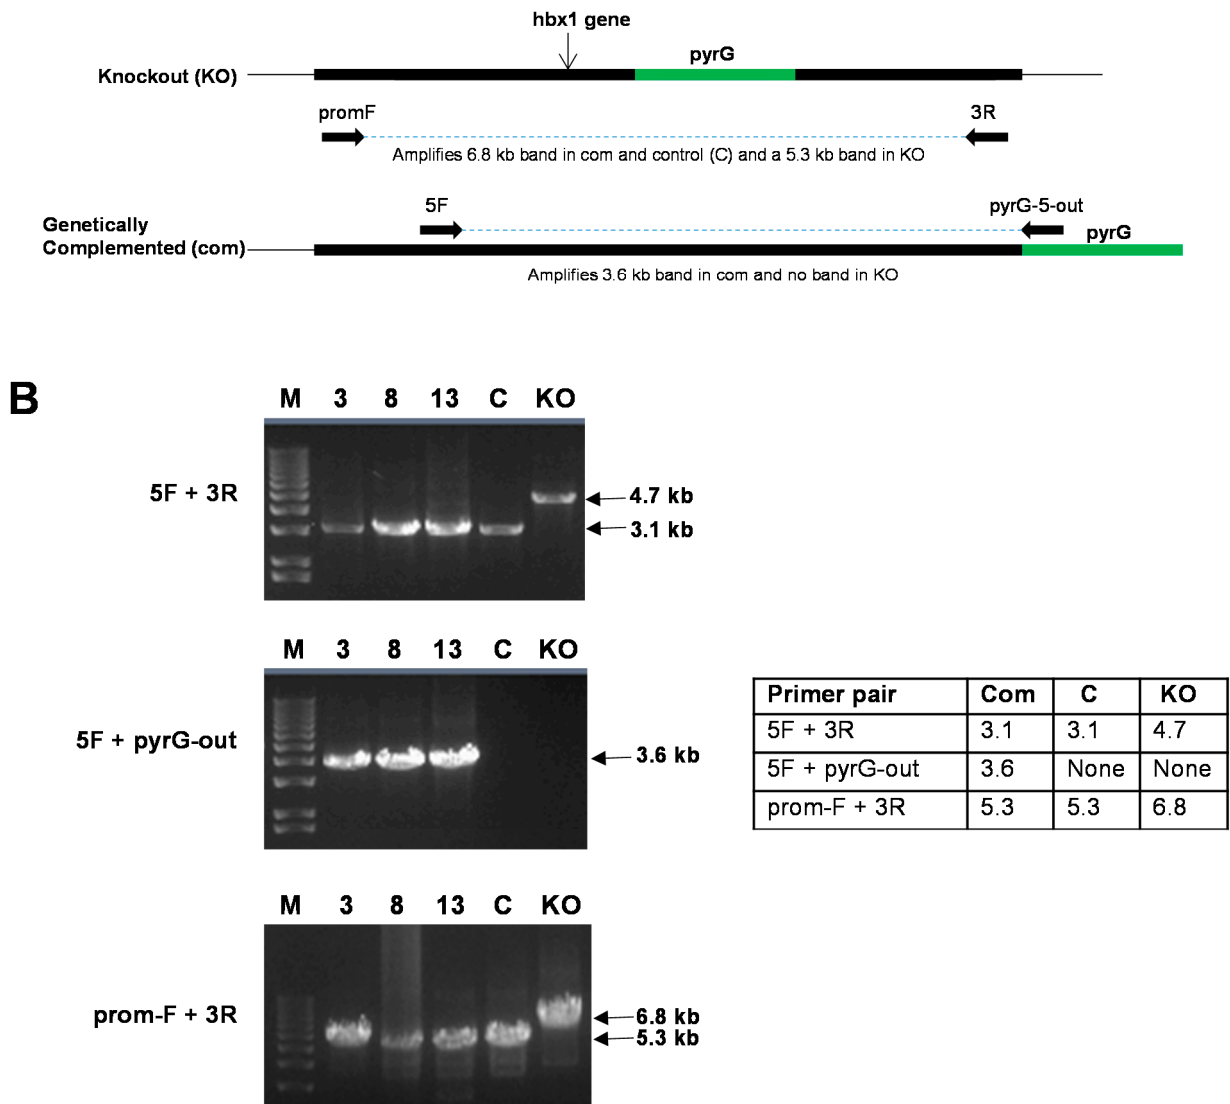

**Figure S5.** Analysis of three putative AF70  $\Delta hbx1$ -com transformants. (A) Schematic depicting integration of the *hbx1*-*pyrG* PCR product at the site of the *hbx1* deletion via homologous recombination and predicted sizes of PCR products using 3 sets of diagnostic primer pairs. (B) PCR confirmation that a wild-type copy of the *hbx1* gene had integrated at the site of the deleted *hbx1* gene using 3 primer pairs (5F/3R, 5F/*pyrG*-out, and *prom*-F/3R).

**A**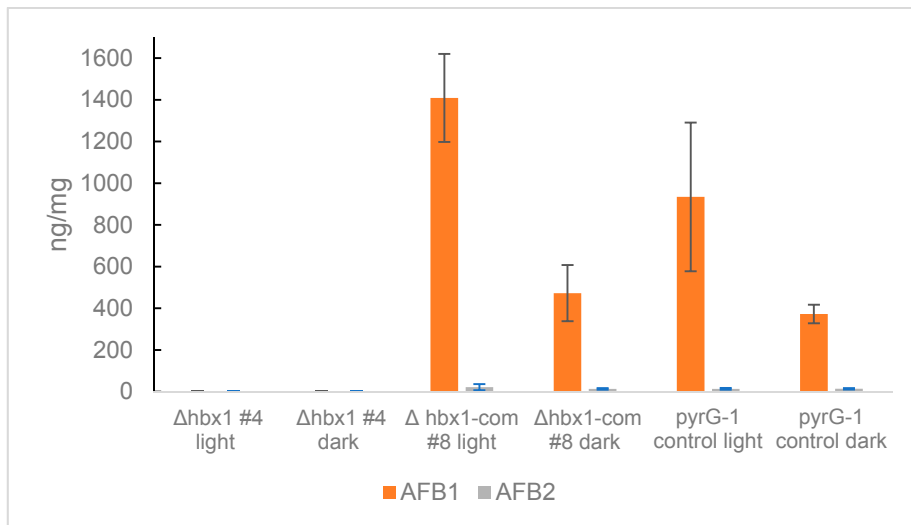**B**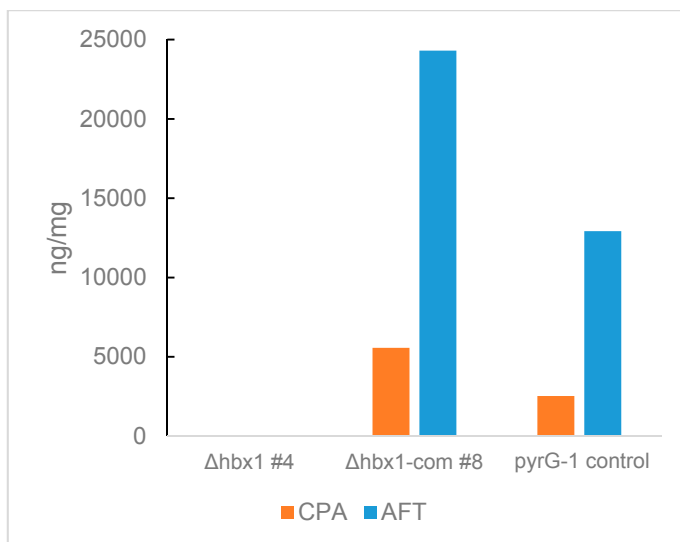

**Figure S6. Analysis of secondary metabolites in *A. flavus* strains.** (A) Aflatoxin B1 and B2 production in the AF70 control,  $\Delta hbx1$  #4 mutant and  $\Delta hbx1$ -com #8 genetically complemented strain. Strains were grown on WKMU agar for 7 days at 30 °C in the dark or with illumination. Extracts were analyzed on a Waters Acquity UPLC system using fluorescence detection (ex = 365 nm, em = 440 nm). (B) CPA and aflatrem (AFT) production in the *A. flavus* strains following growth on WKMU agar for 14 days at 30 °C in the dark or with illumination. Peak area at  $\lambda = 280$  nm was used to quantify both compounds from UPLC-PDA chromatograms.

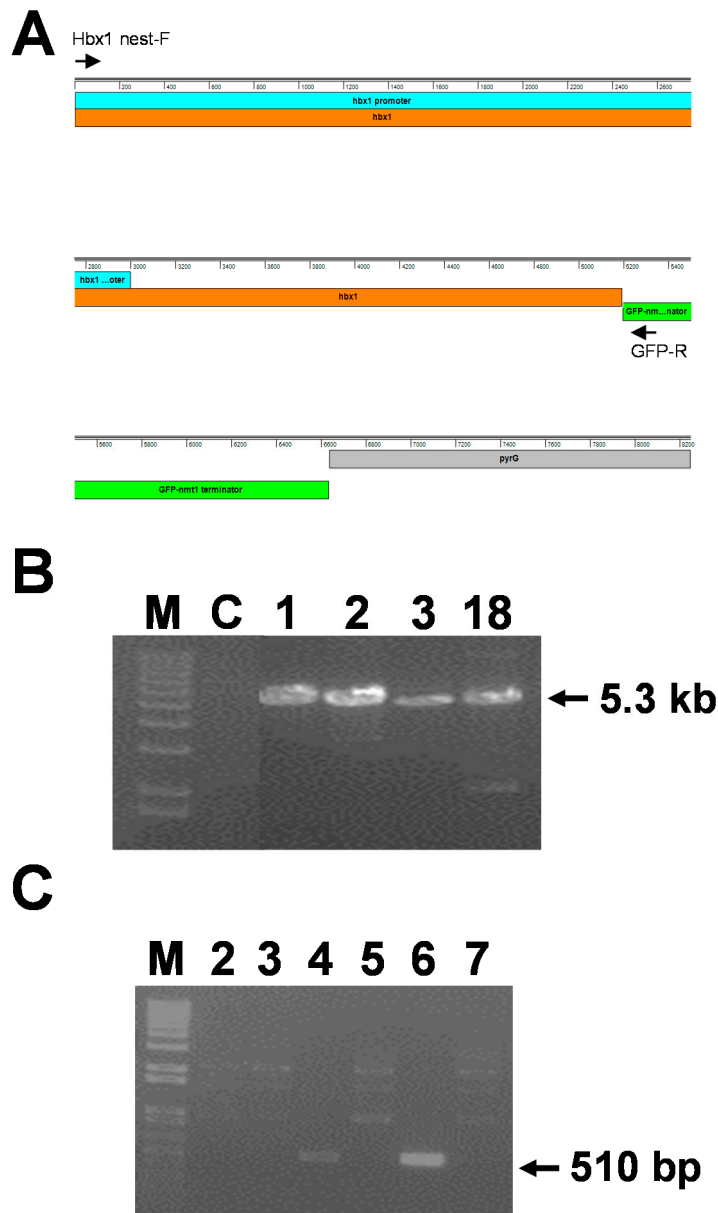

**Figure S7. Schematic representation and PCR confirmation of CA14 transformants carrying the *hbx1*-GFP-*nmt1* term-*pyrG* vector and *gpd* promoter-H2A-mCherry co-transformation. (A)** Schematic of the *hbx1*-GFP-*nmt1* term-*pyrG* PCR product used to transform CA14 for subsequent localization of the *hbx1*-GFP protein in *A. flavus* cells. **(B)** PCR confirmation of CA14 transformants harboring an integrated copy of the *hbx1*-GFP-*nmt1* term-*pyrG* PCR product using primers *hbx1* nest-F and GFP-R primers. A product of 5.3 kb in size was observed in all transformants but not from control DNA, as expected. Transformant #18 was used in all experiments. **(C)** PCR confirmation of CA14 co-transformants harboring an integrated copy of the *hbx1*-GFP-*nmt1* term-*pyrG* PCR and the *gpd*-H2A-mCherry vector. A product of the expected size of 510 bp was detected in transformants 4 and 6 following amplification of genomic DNA with primers specific for the mCherry gene region (mCherry-F, AAGCTGAAGG TCACCAAGGG and mCherry-R GTACTGCTCGACGATGGTGT). Abbreviations: M, molecular size marker; C, CA14 control.
